# Supplementary material
Source: HighWire-hosted journal article supplement (http://dmd.aspetjournals.org/highwire/filestream/83439/field_highwire_adjunct_files/0/1798_supp_data.pdf)
Supplement: 1798_supp_data.pdf [file 1798_supp_data.pdf]

## SUPPLEMENTAL DATA

**Authors:** Mikael O. W. Piha, Kristiina Cajanus, Marica T. Engström, Mikko Neuvonen, Troels K. Bergmann, Mikko Niemi, Janne T. Backman, Anne M. Filppula, Aleksi Tornio

**Title:** Candesartan Has No Clinically Meaningful Effect on the Plasma Concentrations of CYP2C8 Substrate Repaglinide in Humans

Drug Metabolism and Disposition: DMD-AR-2024-001798

### Supplemental Methods

The liver-to-plasma ratios of candesartan and candesartan acyl- $\beta$ -D-glucuronide in humans were predicted using Simcyp version 23 release 1 (Certara UK Limited, Sheffield, UK). The relevant input values, derived from either the literature or the present study, and the predicted liver-to-plasma ratios are presented in Supplemental Table 1.

The static interaction predictions (described in the main manuscript) were based either on the assumption that the liver-to-plasma ratios of candesartan and candesartan acyl- $\beta$ -D-glucuronide were equal to 1, or on a worst-case scenario. Assuming a worst-case scenario, the predicted liver-to-plasma ratio (3.88; Supp. Table 1) was used for candesartan. For candesartan acyl- $\beta$ -D-glucuronide, however, the predicted liver-to-plasma ratio was lower than 1 (Supp. Table 1). To avoid any underestimation of the drug-drug interaction risk, a ratio of 1 was used for candesartan acyl- $\beta$ -D-glucuronide also in the worst-case static drug-drug interaction predictions.

SUPPLEMENTAL TABLE 1

Biochemical input parameters, and predicted liver-to-blood ratios of candesartan and  
candesartan acyl- $\beta$ -D-glucuronide.

| Parameter                                                | Value       | Reference/Comment |
|----------------------------------------------------------|-------------|-------------------|
| <i>Candesartan</i>                                       |             |                   |
| molar mass (g/mol)                                       | 440.463     | Chemicalize       |
| $\log P$                                                 | 4.1         | PubChem           |
| $pK_a$                                                   | 3.51 (acid) | Chemicalize       |
| $f_{u,p}$                                                | 0.01        | FDA, 1998         |
| $R_L^a$                                                  | 3.8793      | Predicted         |
| <i>Candesartan acyl-<math>\beta</math>-D-glucuronide</i> |             |                   |
| molar mass (g/mol)                                       | 616         | Chemicalize       |
| $\log P$                                                 | 2.5         | PubChem           |
| $pK_a$                                                   | 3.21 (acid) | Chemicalize       |
| $f_{u,p}$                                                | 0.01        | Present study     |
| $R_L^a$                                                  | 0.53574     | Predicted         |

*a* liver-to-plasma ratio

## References

Chemicalize, <https://chemicalize.com/> (Accessed: August 20, 2024)

National Center for Biotechnology Information (2024) PubChem Compound Summary for CID 2541, Candesartan. Retrieved August 20, 2024 from <https://pubchem.ncbi.nlm.nih.gov/compound/Candesartan>.

National Center for Biotechnology Information (2024) PubChem Compound Summary for CID 131769984, Candesartan O-glucuronide. Retrieved August 20, 2024 from <https://pubchem.ncbi.nlm.nih.gov/compound/Candesartan-O-glucuronide>.

United States Food and Drug Administration, Center for Drug Evaluation and Research (1998) Atacand clinical pharmacology and biopharmaceutics review. NDA 20-838:1-30. Retrieved April 25, 2023 from [https://www.accessdata.fda.gov/drugsatfda\\_docs/nda/98/20838\\_ATACAND\\_biopharmr\\_P1.pdf](https://www.accessdata.fda.gov/drugsatfda_docs/nda/98/20838_ATACAND_biopharmr_P1.pdf).
